# Supplementary material
Source: Springer Nature journal article supplement (https://www.springermedizin.de/resource/supplementary/12936_2011_2438_MOESM3_ESM.pdf/9542636)

No Drug

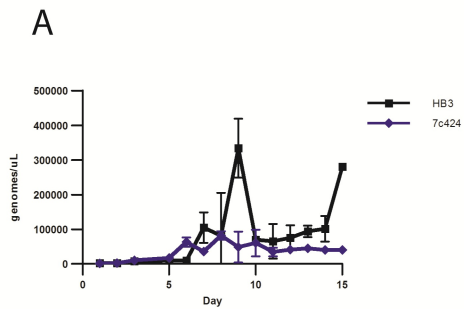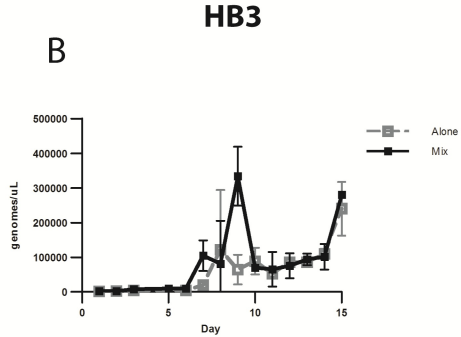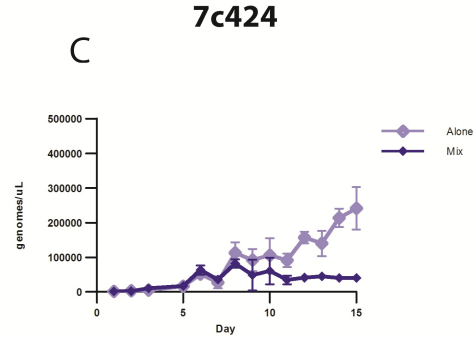

72 hr CQ Treat

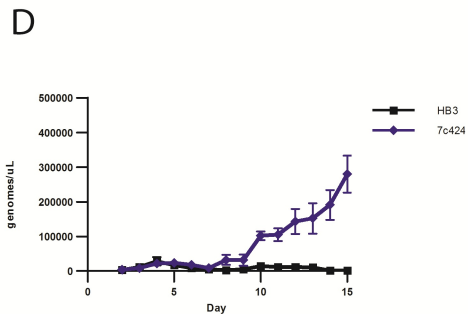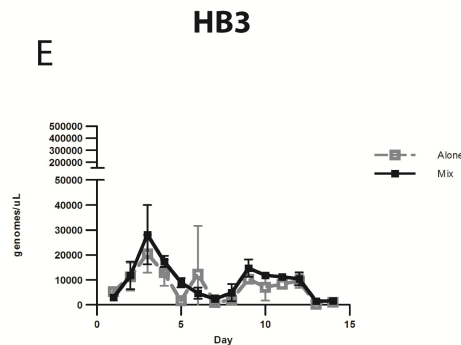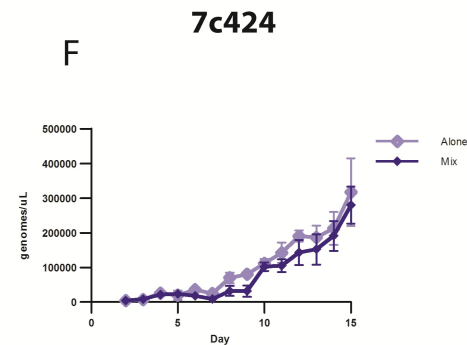

120 hr CQ Treat

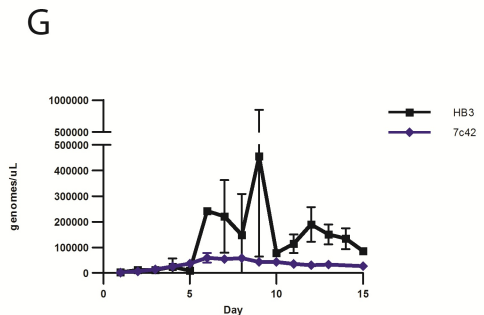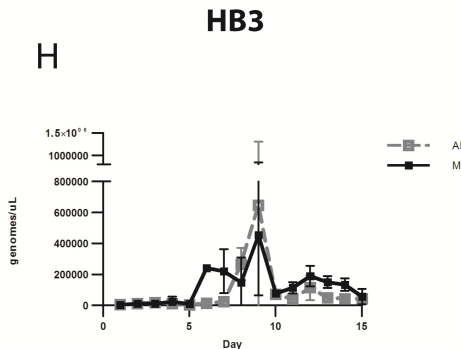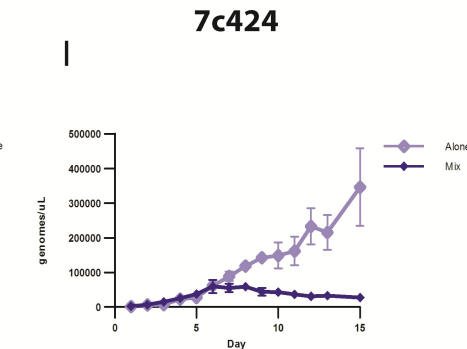

Supplement: MOESM3 [file 9542636]
